# Supplementary material for: CIC-Mediated Modulation of MAPK Signaling Opposes Receptor Tyrosine Kinase Inhibitor Response in Kinase-Addicted Sarcoma
Source: PubMed Central journal article supplement — Cancer Res. 2022 Mar 15;82(6):1110–27. doi: 10.1158/0008-5472.CAN-21-1397 (PMC8930606; doi:10.1158/0008-5472.can-21-1397), 2022-03-15
Supplement: NIHMS1775829-supplement-2.pdf [file NIHMS1775829-supplement-2.pdf]

## Supplementary Figure S2

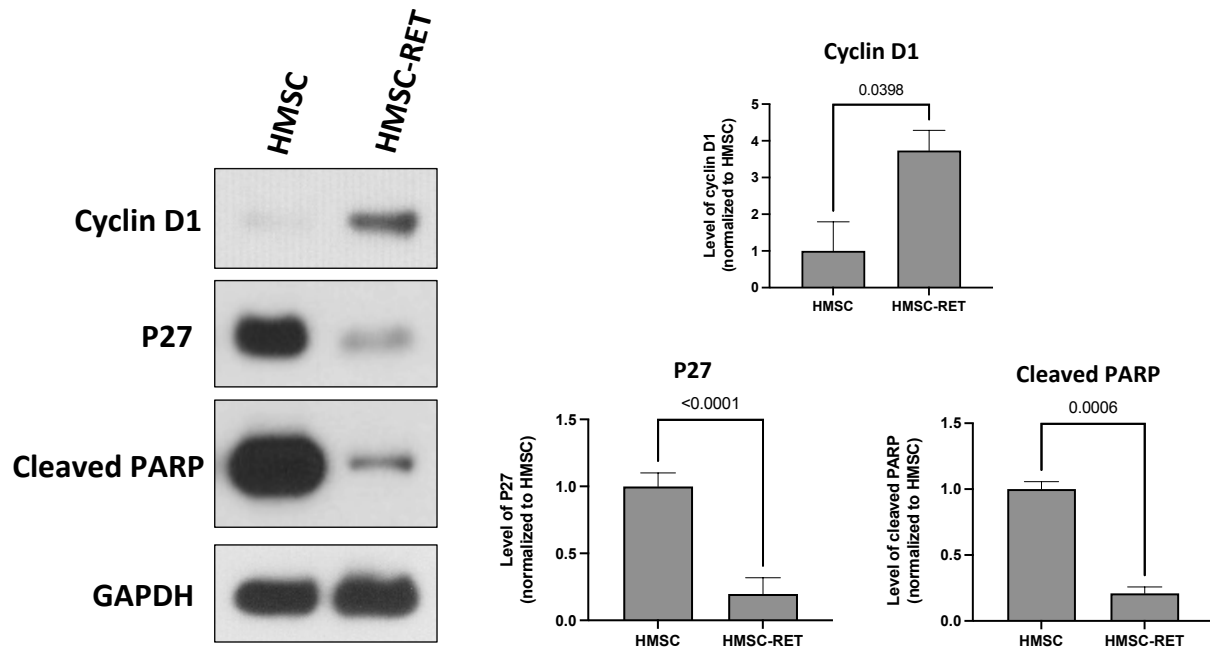

**Supplementary Figure S2. Comparison of proliferation and apoptosis makers in HMSC-RET and HMSC spheroids.** Cells were grown in ultra low attachment plates and then whole-cell extracts prepared for western blot analysis. Representative immunoblots from two independent experiments are shown in the left panels. Immunoblots were quantitated by densitometry and is shown in the right panels.
