# Supplementary material for: CIC-Mediated Modulation of MAPK Signaling Opposes Receptor Tyrosine Kinase Inhibitor Response in Kinase-Addicted Sarcoma
Source: PubMed Central journal article supplement — Cancer Res. 2022 Mar 15;82(6):1110–27. doi: 10.1158/0008-5472.CAN-21-1397 (PMC8930606; doi:10.1158/0008-5472.can-21-1397), 2022-03-15
Supplement: NIHMS1775829-supplement-3.pdf [file NIHMS1775829-supplement-3.pdf]

### Supplementary Figure S3

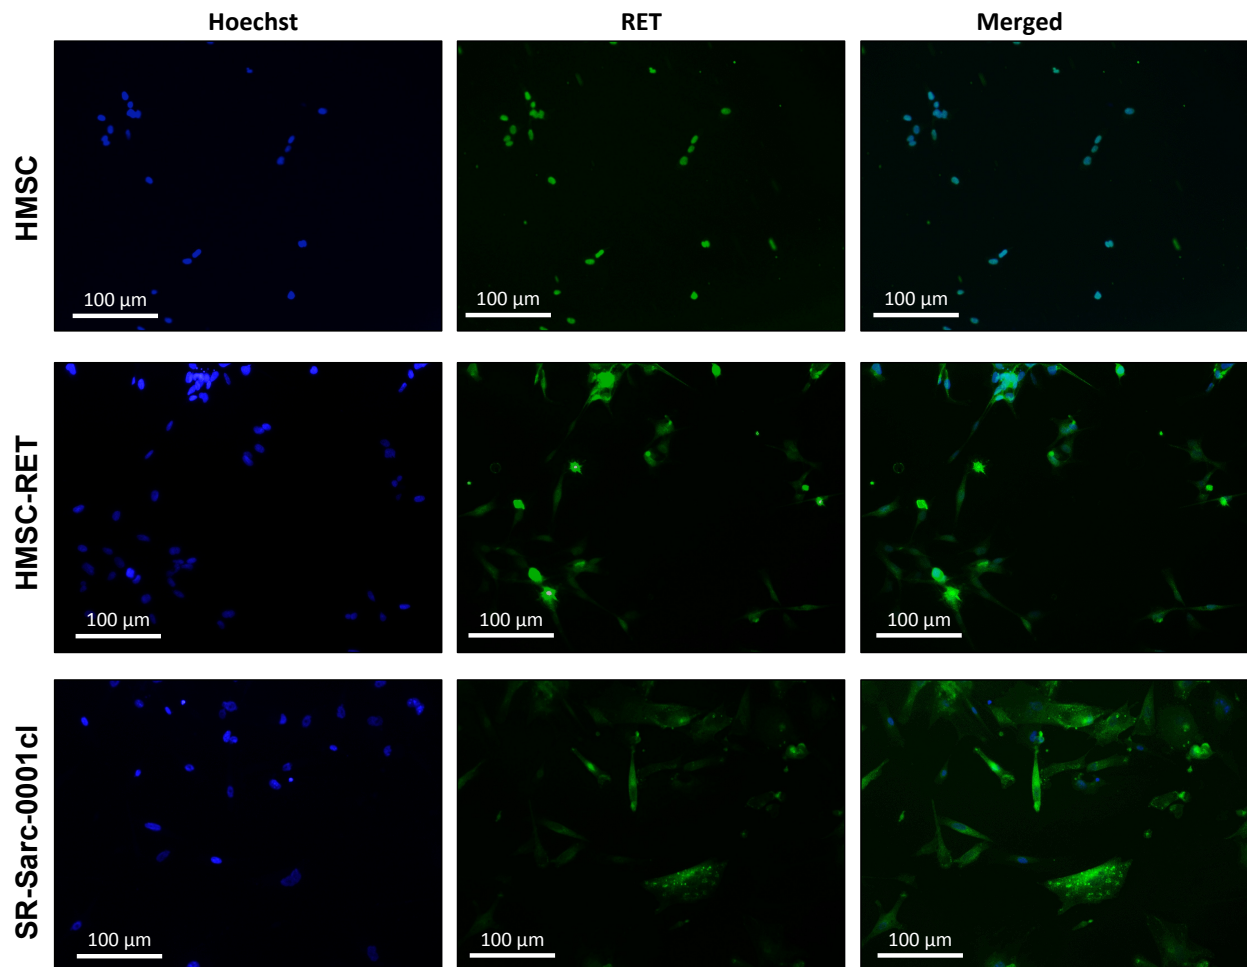

**Supplementary Figure S3. Expression and sub-cellular localization of RET.** Cells were seeded into chamber slides and twenty-four hours later immunofluorescence staining for RET was performed in HMSC, HMSC-RET and SR-Sarc-0001 cells (SR-Sarc-0001cl). Representative fields are shown.
