# Supplementary material for: CIC-Mediated Modulation of MAPK Signaling Opposes Receptor Tyrosine Kinase Inhibitor Response in Kinase-Addicted Sarcoma
Source: PubMed Central journal article supplement — Cancer Res. 2022 Mar 15;82(6):1110–27. doi: 10.1158/0008-5472.CAN-21-1397 (PMC8930606; doi:10.1158/0008-5472.can-21-1397), 2022-03-15
Supplement: NIHMS1775829-supplement-4.pdf [file NIHMS1775829-supplement-4.pdf]

# Supplementary Figure S4

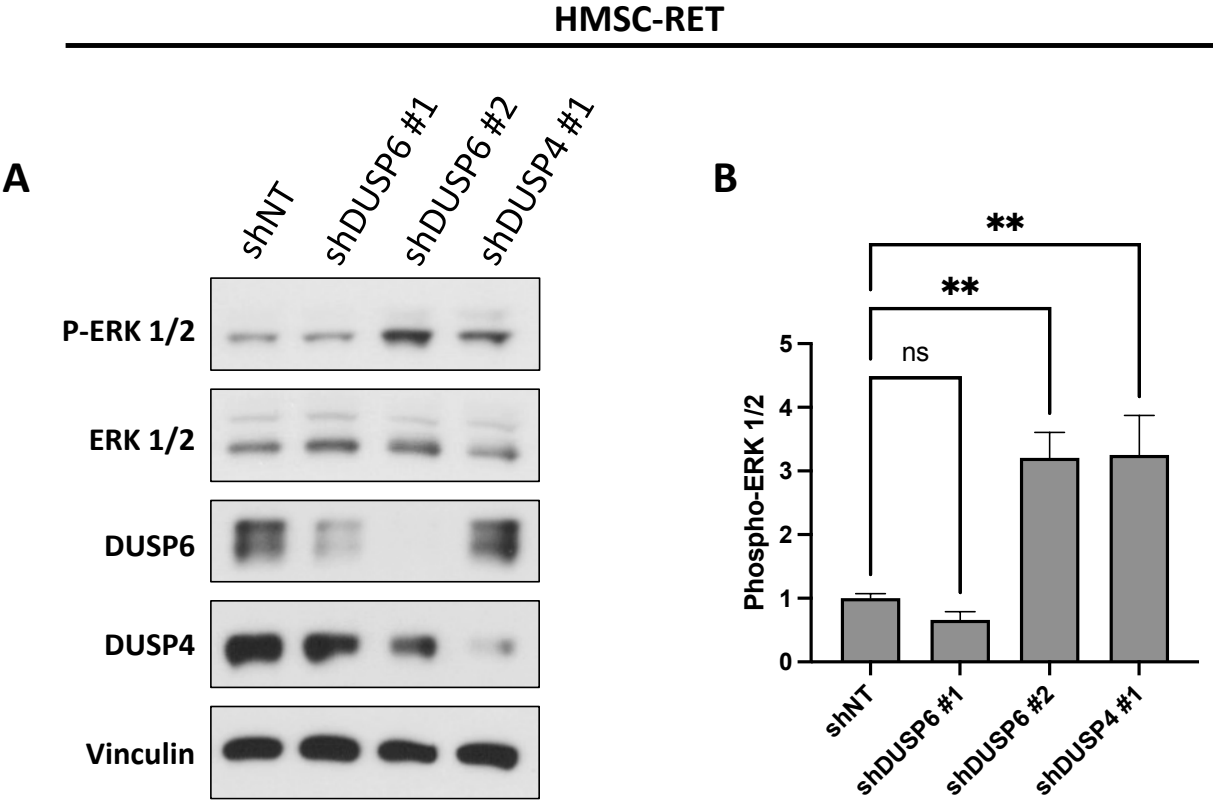

**Supplementary Figure S4. ERK phosphorylation is dependent on DUSP4 and DUSP6 expression.** HMSC-RET cells were transduced with lentivirus harboring shRNAs targeting *DUSP4* and *DUSP6*, or non-targeting shRNAs (shNT) and then selected with 1  $\mu$ g/mL puromycin 48 h later. Cell extracts were prepared (four days after transduction) and probed for the indicated proteins. **A.** Western blotting analysis was conducted and representative immunoblots are shown. **B.** Immunoblots were quantitated by densitometry. Results are the mean  $\pm$  SD of two independent experiments. \*\* $P < 0.001$ . ns: not significant.
