# Supplementary material for: CIC-Mediated Modulation of MAPK Signaling Opposes Receptor Tyrosine Kinase Inhibitor Response in Kinase-Addicted Sarcoma
Source: PubMed Central journal article supplement — Cancer Res. 2022 Mar 15;82(6):1110–27. doi: 10.1158/0008-5472.CAN-21-1397 (PMC8930606; doi:10.1158/0008-5472.can-21-1397), 2022-03-15
Supplement: NIHMS1775829-supplement-5.pdf [file NIHMS1775829-supplement-5.pdf]

# Supplementary Figure S5

**A**

## HMSC-RET

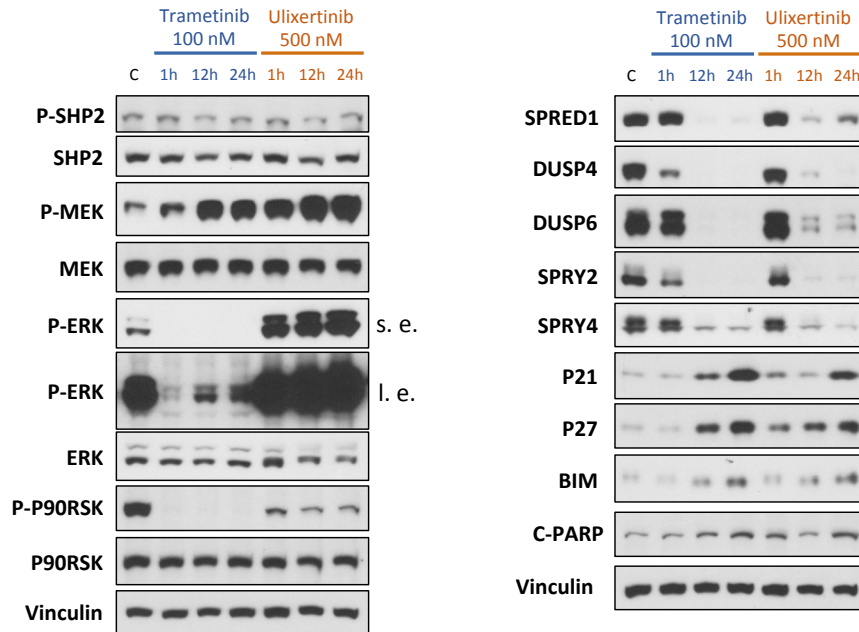

**B**

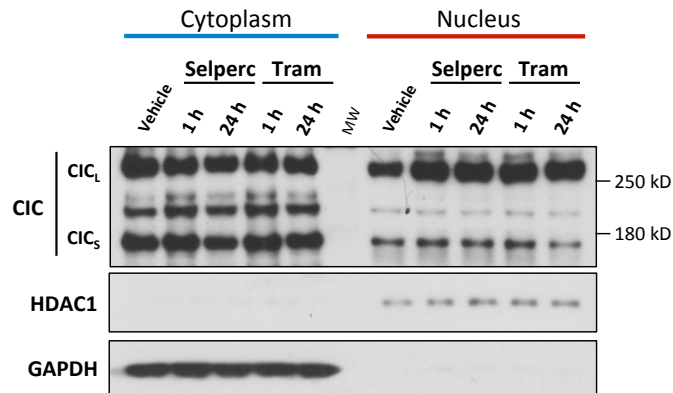

**Supplementary Figure S5. Effect of MEK and ERK inhibitors on MAPK pathway regulators and subcellular localization of CIC. A.** HMSC-RET cells were treated with 100 nM trametinib or 500 nM ulixertinib for the indicated times and then whole-cell extracts prepared for western blotting analysis. One representative immunoblot from two independent experiments is shown for each protein. s.e. – shorter exposure, l.e. – longer exposure. **B.** HMSC-RET Cells were treated with 100 nM selpercatinib and 100 nM trametinib for 1 h or 24 h, and then cytoplasmic and nuclear extracts prepared separately for western blotting. GAPDH represents a cytoplasmic protein loading control and HDAC1 represents a nuclear protein loading control. Selperc: selpercatinib, 100 nM, Tram: trametinib, 100 nM.
