# Supplementary material for: CIC-Mediated Modulation of MAPK Signaling Opposes Receptor Tyrosine Kinase Inhibitor Response in Kinase-Addicted Sarcoma
Source: PubMed Central journal article supplement — Cancer Res. 2022 Mar 15;82(6):1110–27. doi: 10.1158/0008-5472.CAN-21-1397 (PMC8930606; doi:10.1158/0008-5472.can-21-1397), 2022-03-15
Supplement: NIHMS1775829-supplement-7.pdf [file NIHMS1775829-supplement-7.pdf]

## Supplementary Figure S7

**A**

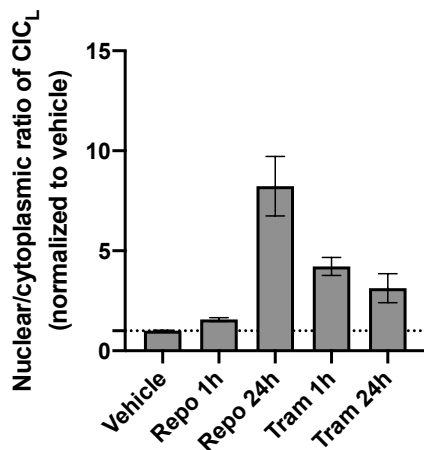

**B**

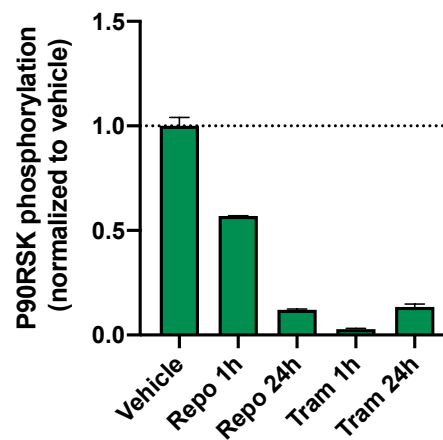

**Supplementary Figure S7.** SR-Sarc-0002 cells were treated with repotrectinib (250 nM) or trametinib (100 nM) for one and twenty-four hours, and nuclear and cytoplasmic extracts prepared for western blotting analysis. **A.** Densitometry signal of the nuclear and cytoplasmic CIC<sub>L</sub> was quantified and nuclear to cytoplasmic ratio was calculated. Resulting values were normalized to the vehicle-treated control. **B.** Densitometry signal of the phosphorylated-P90RSK (detected only in cytoplasmic fraction) was quantified and normalized to the total P90RSK (both detected only in cytoplasmic fraction). Resulting values were normalized to the vehicle-treated control. Repo: repotrectinib, 250 nM. Tram: trametinib, 100 nM.
